# Supplementary material for: Using place-based characteristics to inform FDA tobacco sales inspections: results from a multilevel propensity score model
Source: PubMed Central journal article supplement (PMC9726945; doi:10.1136/tobaccocontrol-2021-056742), 2021-10-25
Supplement: tobaccocontrol-2021-056742supp001.pdf [file tobaccocontrol-2021-056742supp001.pdf]

1 **Appendix Figure 1. Predicted Propensity Score of RVSM over 26,131 zip codes with  $\geq 1$**   
2 **tobacco retails in 2019 <sup>a</sup>**

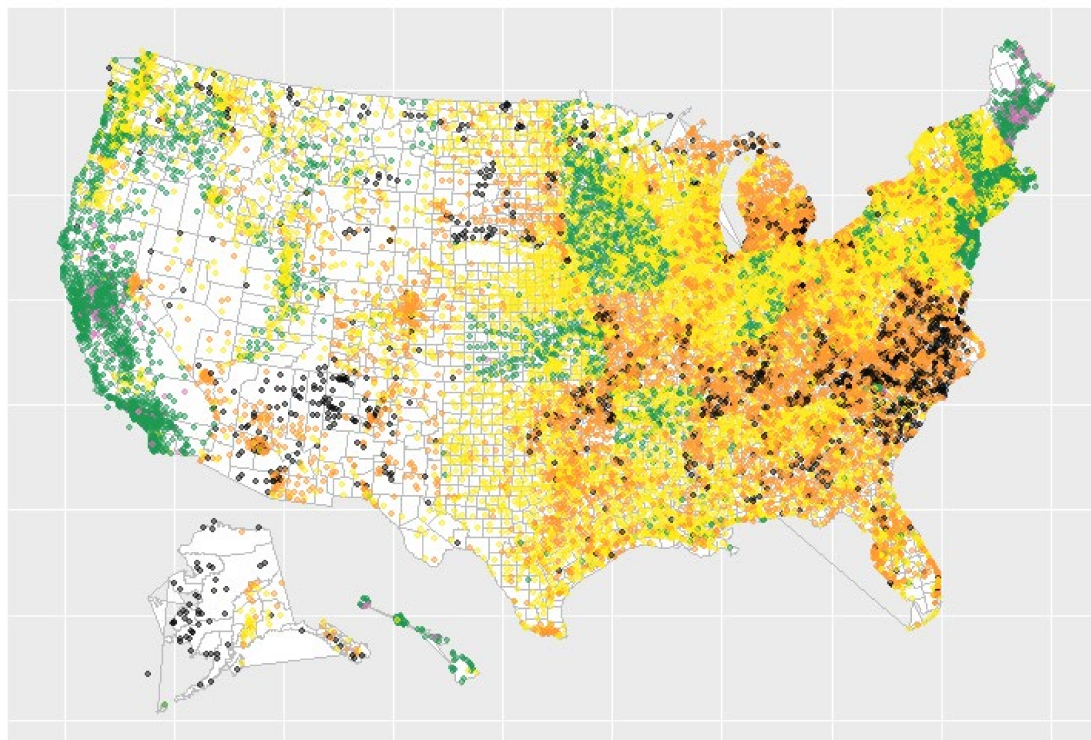

Propensity score (0, 0.05] (0.05, 0.1] (0.1, 0.15] (0.15, 0.2] (0.2, 1]

3  
4  
5

<sup>a</sup> Each dot stands for the centroid of zip codes with tobacco retailers.

6 **Appendix Table 1. Number of Tobacco Retailers by Decile of PSM and Number of FDA**  
 7 **Compliance Inspections (n=26,131 with ≥1 tobacco retailer), 2017**

| Decile of PSM for RVSM <sup>a</sup> | Number of compliance inspections at each zip code, 2017 |        |        |        |         |         |
|-------------------------------------|---------------------------------------------------------|--------|--------|--------|---------|---------|
|                                     | 0                                                       | 1      | 2-3    | 4-9    | 10+     | Total   |
| 1                                   | 24,809                                                  | 2,513  | 3,075  | 5,481  | 21,011  | 56,889  |
| 2                                   | 5,606                                                   | 1,166  | 2,624  | 4,938  | 15,408  | 29,742  |
| 3                                   | 6,308                                                   | 1,449  | 2,704  | 5,304  | 12,682  | 28,447  |
| 4                                   | 6,468                                                   | 1,991  | 2,780  | 5,770  | 9,700   | 26,709  |
| 5                                   | 7,709                                                   | 2,196  | 3,117  | 5,863  | 12,368  | 31,253  |
| 6                                   | 8,801                                                   | 2,417  | 3,374  | 6,723  | 10,660  | 31,975  |
| 7                                   | 10,227                                                  | 2,335  | 3,149  | 6,494  | 9,481   | 31,686  |
| 8                                   | 10,968                                                  | 2,678  | 3,647  | 7,315  | 9,428   | 34,036  |
| 9                                   | 10,692                                                  | 2,766  | 4,333  | 6,897  | 13,199  | 37,887  |
| 10                                  | 11,648                                                  | 2,075  | 3,639  | 7,898  | 21,706  | 46,966  |
| Total                               | 104,549                                                 | 21,880 | 32,622 | 63,020 | 135,999 | 355,590 |

8  
 9  
 10  
 11  
 12

<sup>a</sup> The propensity score was ranked in the order from the lowest (1, the bottom decile) to the highest (10, the top decile) in predicting 2017 RVSM.
